1 **Title:** Neurobiological underpinnings of rapid white matter plasticity during intensive  
2 reading instruction

3

4 **Abbreviated title:** Neurobiology of white matter plasticity

5

6 **Authors:** Elizabeth Huber<sup>1</sup>, Aviv Mezer<sup>2</sup>, Jason D. Yeatman<sup>3,4</sup>

7

8 <sup>1</sup>Institute for Learning and Brain Sciences and Department of Speech and Hearing  
9 Sciences, University of Washington, Seattle, WA, 98195

10 <sup>2</sup>Edmond & Lily Safra Center for Brain Sciences, The Hebrew University of Jerusalem,  
11 Jerusalem, Israel

12 <sup>3</sup>Graduate School of Education, Stanford University, Stanford, CA, 94305

13 <sup>4</sup>Division of Developmental-Behavioral Pediatrics, Stanford University School of  
14 Medicine, Stanford, CA, 95305.

15

16 **Corresponding Author:** Elizabeth Huber, [ehuber@uw.edu](mailto:ehuber@uw.edu)

17 **Conflict of Interest:** The authors declare no financial or other conflict of interest.

18

19 **Acknowledgements:** This work was funded by NSF/BSF BCS #1551330/ #2015608,  
20 Eunice Kennedy Shriver National Institute of Child Health and Human Development  
21 Grant R01 HD09586101 and Jacobs Foundation Research Fellowship to JDY.

22 **Abstract**

23

24 Human white matter is remarkably plastic. Yet it is challenging to infer the biological  
25 underpinnings of this plasticity using non-invasive measurements like diffusion MRI. Here  
26 we capitalize on metrics derived from diffusion kurtosis imaging (DKI) to interpret  
27 previously reported changes in mean diffusivity throughout the white matter during an 8-  
28 week, intensive reading intervention. We then use an independent quantitative MRI  
29 measurement of R1 (1/T1 relaxation time) in the same white matter regions; since R1  
30 closely tracks variation in myelin content, it provides complementary information about  
31 white matter microstructure. Behavioral measures, multi-shell diffusion MRI data, and  
32 quantitative T1 data were collected at regular intervals during the intervention in a group  
33 of 33 children with reading difficulties (7-12 years old), and over the same period in an  
34 age-matched non-intervention control group. Changes in DKI parameters modeled over the  
35 intervention were consistent with increased hindrance in the extra-axonal space, rather than  
36 a large-scale change in axon density and/or myelination. Supporting this interpretation,  
37 analysis of R1 values did not suggest a change in myelin, although R1 estimates were  
38 correlated with individual differences in reading skill. Together, these results suggest that  
39 large-scale changes in diffusivity observed over a short timescale during an intensive  
40 educational experience are most likely to reflect changes occurring in the extra-axonal  
41 space, in line with recent work highlighting the role of glial cells in experience-dependent  
42 plasticity and learning.

43

44 **Keywords:** Diffusion MRI; quantitative MRI; white matter modeling; plasticity; reading

45

## 46 **Introduction**

47

48 Experience can modify the microstructure of the white matter over remarkably short  
49 timescales (Taubert, Draganski et al. 2010, Blumenfeld-Katzir, Pasternak et al. 2011,  
50 Engvig, Fjell et al. 2012, Hofstetter, Tavor et al. 2013, Mamiya, Richards et al. 2016, Huber  
51 2018). The majority of past work examining white matter plasticity in humans has relied  
52 on diffusion MRI (dMRI) and metrics derived from the diffusion tensor model (DTI;  
53 Basser et al., 1996; Beaulieu 2002), which are sensitive to myriad features of the white  
54 matter, including the number, size and branching of glial cells, the density and caliber of  
55 axons, the abundance of myelin, and the spatial arrangement of fibers within an imaging  
56 voxel (Basser and Pierpaoli 1996, Alexander, Lee et al. 2007, Walhovd, Johansen-Berg et  
57 al. 2014). The diffusion kurtosis model (DKI; Jensen et al., 2005) offers increased  
58 sensitivity to microstructural variation and, potentially, increased specificity, by modeling  
59 variation in the diffusion signal that is not considered by the tensor model (Cheung et al.,  
60 2009; Veraart et al., 2010; Steven et al., 2014), although DKI metrics (e.g., mean kurtosis,  
61 MK) are generally no more straightforward to interpret than those derived from DTI (e.g.,  
62 mean diffusivity, MD). Thus, a challenge for diffusion MRI studies of white matter  
63 plasticity is to understand the neurobiological underpinnings of the observed changes in  
64 diffusion properties since a variety of distinct mechanisms could account for the data.

65

66 Over the last decade, a host of modeling approaches have been developed to exploit  
67 biologically informed priors in pursuit of a more accurate and interpretable parcellation of  
68 the diffusion signal (Jelescu and Budde 2017, Alexander, Dyrby et al. 2019). For example,

69 the recent white matter tract integrity (WMTI) model (Fieremans, Novikov et al. 2010,  
70 Fieremans, Jensen et al. 2011) builds on DKI by defining separable axonal and extra-axonal  
71 contributions to the diffusion signal, which are explicitly modeled to provide metrics such  
72 as axonal water fraction (AWF) and extra-axonal diffusivity. These parameters have  
73 previously been shown to be sensitive to individual differences in white matter as a  
74 function of age (Chang, Owen et al. 2015, Jelescu, Veraart et al. 2015, Genc, Malpas et al.  
75 2017) and cognitive performance (Chung, Fieremans et al. 2018), as well as white matter  
76 pathology (Fieremans, Benitez et al. 2013, Benitez, Fieremans et al. 2014), including de-  
77 myelination (Falangola, Guilfoyle et al. 2014, Jelescu, Veraart et al. 2015, Guglielmetti,  
78 Veraart et al. 2016, Jelescu, Zurek et al. 2016, Kelm, West et al. 2016). With appropriate  
79 pre-processing, AWF and extra-axonal diffusivity are highly reliable, even given the  
80 constraints associated with data collection in young children (Huber 2018).

81

82 Microstructural modeling of the diffusion signal thus holds promise for illuminating the  
83 biological underpinnings of white matter development, pathology, and plasticity. However,  
84 even the most sophisticated models incorporate simplifying assumptions about the  
85 underlying tissue, and many require that the user to set constraints, such as the absolute or  
86 relative expected diffusivity of individual tissue compartments (Jelescu, Veraart et al.  
87 2015). Although it is often possible to make principled choices, in some cases, the most  
88 appropriate set of model assumptions is still up for debate: For example, while the WMTI  
89 model has previously been validated under the assumption that extra-axonal diffusivity is  
90 greater than intra-axonal diffusivity (Guglielmetti, Veraart et al. 2016, Jelescu, Zurek et al.  
91 2016), recent work suggests that the opposite assumption may be more appropriate (intra-

92 axonal greater than extra-axonal diffusivity: (Jespersen, Olesen et al. 2018, Kunz, da Silva  
93 et al. 2018). Thus, even state-of-the-art modeling techniques may be open to multiple  
94 interpretations and, while model parameters can be used to inform new linking hypotheses,  
95 it is not possible to directly link changes in any one parameter to a specific change in tissue  
96 biology.

97

98 Multi-modal studies that combine microstructural modeling with complementary  
99 measurements, such as quantitative T1 mapping, can provide critical insight beyond what  
100 can be gleaned from diffusion alone (Cercignani and Bouyagoub 2018, Filo, Shtangel et  
101 al. 2019, Takemura, Ogawa et al. 2019, Travis, Castro et al. 2019). For example, in a large  
102 cross-sectional study, complementary DTI and quantitative T1 relaxation measurements  
103 showed distinct trajectories over the lifespan (Yeatman et al., 2014). Quantitative T1  
104 measurements capture the interaction between tissue density and the chemical composition  
105 of that tissue (Mezer, Yeatman et al. 2013, Stuber, Morawski et al. 2014, Filo, Shtangel et  
106 al. 2019), such that T1 values are more attenuated in highly myelination regions, while  
107 diffusion measurements are influenced by any cell membrane capable of hindering the  
108 diffusion process(Le Bihan 1995). Thus, the authors reasoned that the discrepancy between  
109 measures could reflect changes in various non-neuronal cell types (microglia,  
110 oligodendrocyte precursor cells (OPC), and/or astrocytes). Such changes are presumed to  
111 occur alongside changes in myelination, but with distinct dynamics over the lifespan.

112

113 Experience-dependent plasticity in the white matter likely depends on processes no less  
114 complex than those unfolding over maturation and aging. Learning related changes in white

115 matter diffusivity could theoretically reflect a number of distinct biological phenomena,  
116 such as activity-dependent changes in myelination or glial cell proliferation (Blumenfeld-  
117 Katzir, Pasternak et al. 2011, Lerch, Yiu et al. 2011, Sagi, Tavor et al. 2012, Sampaio-  
118 Baptista, Khrapitchev et al. 2013, Gibson, Purger et al. 2014). In animal models, short-term  
119 learning has been associated both with remodeling of myelin and proliferation of glial cells  
120 in the gray and white matter (Blumenfeld-Katzir, Pasternak et al. 2011, Lerch, Yiu et al.  
121 2011, Sagi, Tavor et al. 2012, Sampaio-Baptista, Khrapitchev et al. 2013). In the white  
122 matter, the size of non-axonal effects can even exceed subsequent changes in myelination  
123 (Gibson, Purger et al. 2014), which has been interpreted as reflecting an initial over-  
124 production of glial cells associated with the early stages of the learning process. Although  
125 non-invasive MRI measurements cannot directly specify the exact cellular changes that are  
126 occurring, they can be used to reason about the underlying biology of plasticity measured  
127 in the human brain, and they provide a vital link between the literature on human learning  
128 and invasive studies examining plasticity in other species.

129

130 We previously reported that 8 weeks of intensive reading instruction prompts widespread  
131 changes in white matter diffusion properties, which track the learning process (Huber  
132 2018). Given that these effects occurred rapidly, and were distributed throughout the white  
133 matter, we speculated that the changes in diffusivity might reflect an initial stage of the  
134 learning process (e.g., large-scale glial cell proliferation), rather than changes to signal  
135 conduction properties of functionally relevant axons via changes in myelination or axon  
136 caliber. Here, we first confirmed that the previously reported finding of spatially distributed  
137 intervention-driven changes in diffusivity holds in a larger sample of subjects (n=33). We

138 then fit the WMTI model to these data to test for intervention-driven changes in the  
139 estimated axonal water fraction (AWF). Although we observed changes in diffusivity  
140 within the extra-axonal space, we failed to detect changes in AWF. We next explored how  
141 changing certain model assumptions affects the pattern of results in these data. Finally, we  
142 used an independent quantitative MRI measurement of R1 (1/T1 relaxation time) to  
143 examine the same white matter regions. Although R1 estimates were correlated with  
144 individual differences in reading skill, analysis of R1 values did not suggest a change in  
145 myelin content over the 8-week intervention period. Together, these results highlight the  
146 value of multi-modal MRI data for constraining inferences about underlying white matter  
147 biology, while pointing to the potential importance of non-neuronal cell types during the  
148 early stages of learning.

149

## 150 **Materials and Methods**

151

### 152 *Participants*

153

154 A total of 149 behavioral and MRI sessions were conducted with a group of 33 children  
155 ranging in age from 7 to 12 years, who participated in an intensive summer reading  
156 intervention program. Of these subjects, 24 were included in a previous manuscript (Huber  
157 2018). Members of the intervention group were recruited based on parent report of reading  
158 difficulties and/or a clinical diagnosis of dyslexia. Multi-shell diffusion MRI and  
159 behavioral data were collected before the intervention (baseline), after 3.62 (+/- 0.16)  
160 weeks of intervention, after 6.71 (+/- 0.16) weeks of intervention, and at the end of the 8-

161 week intervention period. An additional 78 behavioral and MRI sessions were conducted  
162 with 29 participants, who were matched for age but not reading level. These subjects were  
163 recruited as a control group to assess the stability of our measurements over the repeated  
164 sessions. Control subjects participated in the same experimental sessions but did not  
165 receive the reading intervention. Some families of control group subjects were reluctant to  
166 commit to all four sessions, given that their children were not receiving an educational  
167 intervention. These families were given an opportunity to participate in 2 sessions. The  
168 interval for the two sessions was chosen in order to have balanced numbers of  
169 measurements at equivalent time points to the intervention group. In the intervention group,  
170 5 subjects were unable to complete either the third or the fourth imaging session, and  
171 therefore participated in 3 sessions, total. The distribution of testing sessions for the  
172 intervention and control groups is summarized in **Table 1**.

173

|              | Baseline (0 days) | 11-38                     | 33-77                      | 49-100                     |
|--------------|-------------------|---------------------------|----------------------------|----------------------------|
| Intervention | 33                | 33 (mean 25.36, std 6.70) | 31 (mean 47.00, std 6.23)  | 30 (mean 72.70, std 10.91) |
| Control      | 29                | 20 (mean 22.25, std 6.51) | 16 (mean 44.38, std 10.01) | 12 (mean 58.33, std 5.31)  |

174

175 **Table 1.** Testing schedule for intervention and control groups. Experimental sessions were evenly spaced  
176 for each subject, with a baseline prior to the start of intervention, a second session within 11-38 days  
177 since the start of intervention (column 2), a third session within 33-77 days (column 3), and a fourth  
178 session within 49-100 days (column 4). Each cell gives the number of subjects sampled at each time bin.  
179 In the intervention group, some data sets are missing due to scheduling or data quality issues, while in  
180 the intervention group some subjects elected to complete only 2 sessions (see Methods for details). The  
181 mean number of days and standard deviation for each time bin are given in parenthesis.

182



183 All participants were native English speakers with normal or corrected-to-normal vision  
184 and no history of neurological damage or psychiatric disorder. Subjects were screened  
185 using a mock scanner to assess comfort and ability to hold still during the MRI sessions.  
186 We obtained written consent from parents, and verbal assent from all child participants.  
187 All procedures, including recruitment, consent, and testing, followed the guidelines of the  
188 University of Washington Human Subjects Division and were reviewed and approved by  
189 the UW Institutional Review Board. Subject demographics are given in **Table 2**.

190

|              | WJ-BRS      | TOWRE       | WJ-RF       | WJ-CALC     | WJ-MFF      | Age (months)     |
|--------------|-------------|-------------|-------------|-------------|-------------|------------------|
| Intervention | 80.30/14.27 | 72.42/13.33 | 72.42/18.51 | 85.68/13.48 | 83.10/16.11 | 112.58/<br>20.58 |
| Control      | 96.55/19.59 | 86.74/22.31 | 91.74/22.33 | 97.45/13.72 | 92.67/18.00 | 117.03/<br>14.38 |

191

192 **Table 2.** Demographic data for the intervention and non-intervention control groups. Each cell contains  
193 the group mean and standard deviation for a given item. Subject groups were matched in age but not  
194 reading skill. The first three columns give mean and standard deviation (mean / standard deviation)  
195 within each group for three standard reading measures: The Basic Reading Skill composite from the  
196 Woodcock Johnson Tests of Achievement (WJ-BRS), the Test of Word Reading Efficiency index  
197 (TOWRE), and The Reading Fluency subtest of the Woodcock Johnson Tests of Achievement (WJ-RF).  
198 Columns 4-5 give standard scores for the Woodcock Johnson Tests of Achievement Calculation (WJ-  
199 CALC) and Math Facts Fluency (WJ-MFF), which measure efficiency and accuracy of math related  
200 skills.

201

202 ***Reading intervention***

203

204 Intervention subjects were enrolled in 8 weeks of the Seeing Stars: Symbol Imagery for  
205 Fluency, Orthography, Sight Words, and Spelling (Bell 2007) program at three different  
206 Lindamood-Bell Learning Centers in the Seattle area. The intervention program consists  
207 of directed, one-on-one training in phonological and orthographic processing skills, lasting  
208 four hours each day, five days a week. The curriculum uses an incremental approach,  
209 building from letters and syllables to words and connected texts, emphasizing phonological  
210 decoding skills as a foundation for spelling and comprehension. A hallmark of this  
211 intervention program is the intensity of the training protocol (4 hours a day, 5 days a week)  
212 and the personalized approach that comes with one-on-one instruction.

213

214 To test for longitudinal change in reading and non-reading (Calculation and Math Facts  
215 Fluency subtests of the Woodcock Johnson Tests of Achievement) measures, we fit a linear  
216 mixed effects model with a fixed effect of intervention time, in days (for control subjects,  
217 this corresponds to days since the baseline session), and a random effect of subject. The  
218 intervention group showed significant gains for all reading measures ( $p < 0.05$  for WJ-  
219 BRS;  $p < 0.0001$  for TOWRE and WJ-RF). We found no significant growth in the non-  
220 reading measures over the same time period. In a subset of reading-matched controls, who  
221 theoretically have as much room to improve on the reading measures as the intervention  
222 subjects (i.e., they are not approaching ceiling on the tests), we found no significant growth  
223 in any reading measure. Within this group, the math fluency (WJ-MFF) did improve with  
224 repeated testing ( $p < 0.001$ ), presumably due to practice on the timed-test. Within the full  
225 control sample (including typical and highly skilled readers), performance on timed tests

226 (TOWRE, WJ-RF, and WJ-MFF) improved with repeated testing ( $p < 0.01$ ), although  
227 reading accuracy (WJ-BRS) and calculation (WJ-CALC) showed no significant change.

228

229 ***Magnetic resonance imaging (MRI) acquisition protocol***

230

231 All imaging data were acquired using a 3T Phillips Achieva scanner (Philips, Eindhoven,  
232 Netherlands) at the University of Washington Diagnostic Imaging Sciences Center (DISC)  
233 using a 32-channel head coil. An inflatable cap minimized head motion, and participants  
234 were continuously monitored through a closed-circuit camera system.

235

236 Diffusion-weighted magnetic resonance imaging (dMRI) data were acquired at  $2.0\text{mm}^3$   
237 spatial resolution with full brain coverage. Each session consisted of 3 DWI scans, one  
238 with 32 non-collinear directions ( $b\text{-value}=800\text{ s/mm}^2$ ), and a second with 64 non-collinear  
239 directions ( $b\text{-value}=2,000\text{ s/mm}^2$ ). Each of the DWI scans included 4 volumes without  
240 diffusion weighting ( $b\text{-value}=0$ ). We also collected one scan with 6 non-diffusion-  
241 weighted volumes and a reversed phase encoding direction (posterior-anterior) to correct  
242 for EPI distortions due to inhomogeneities in the magnetic field using FSL's topup tool  
243 (Andersson, Skare et al. 2003). Additional pre-processing is carried out using tools in FSL  
244 for motion and eddy current correction (Andersson and Sotiropoulos 2016). Data were  
245 manually checked for imaging artifacts and excessive dropped volumes. Given that subject  
246 motion can be especially problematic for the interpretation of group differences in DWI  
247 data (Yendiki, Koldewyn et al. 2014), data sets with mean slice-by-slice displacement  $>$   
248 3mm are excluded from further analysis.

249 For quantitative T1 mapping, we followed protocol developed by (Mezer, Yeatman et al.  
250 2013). We acquired 4 spoiled gradient echo recalled images using two different flip angles  
251 (2 scans with 4° and 2 scans with 20°, all with TR = 14ms, TE = 2.3ms, and resolution of  
252 1 mm<sup>3</sup>). To correct the transmit coil inhomogeneity, we collected 4 spin echo inversion  
253 recovery scans with EPI read-out (SEIR-EPI), with TR 6500, TE 6.46, inversion times of  
254 50, 400, 1200, 2400 ms, and 2mm<sup>2</sup> inplane resolution with a slice thickness of 4 mm. We  
255 then compared T1 fits estimated using the spoiled gradient echo images to fits estimated  
256 using the unbiased (Barral, Gudmundson et al. 2010, Mezer, Yeatman et al. 2013, Mezer,  
257 Rokem et al. 2016) SEIR-EPI images to characterize the inhomogeneity field and apply an  
258 appropriate correction to the biased, high resolution spoiled gradient echo recalled images.

259

### 260 *Modeling white matter tissue properties*

261

262 All diffusion and quantitative T1 data were aligned to a common anatomical reference in  
263 each subject's native, ACPC aligned space. Axonal water fraction and extra-axonal  
264 diffusivities were modeled using the white matter tract integrity (WMTI) model  
265 (Fieremans, Novikov et al. 2010, Fieremans, Jensen et al. 2011), after fitting the diffusion  
266 kurtosis model (Jensen, Helpert et al. 2005). WMTI and DKI fitting was implemented in  
267 DIPY (Garyfallidis, Brett et al. 2014). R1 maps were calculated by taking 1/T1 (seconds)  
268 for each voxel.

269

270 All values were then mapped onto fiber tracts identified for each subject using the  
271 Automated Fiber Quantification software package (Yeatman, Dougherty et al. 2012), after

272 initial generation of a whole-brain connectome using probabilistic tractography (MRtrix  
273 3.0 (Tournier, Calamante et al. 2004)). Since the white matter tract integrity (WMTI)  
274 assumes that fibers are relatively well aligned (Fieremans, Jensen et al. 2011), we followed  
275 recommendations from previous work and restricted our analysis to voxels with fractional  
276 anisotropy values greater than 0.3 (Jensen, Stickley et al. 2017, Jensen, McKinnon et al.  
277 2017, Chung, Fieremans et al. 2018). Specifically, voxels with fractional anisotropy below  
278 0.3 were removed and WMTI metrics were interpolated at each point on each fiber, and  
279 then values were summarized along the fiber-tract core based on computing the median  
280 value across fiber nodes. Our previous work has demonstrated that summarizing values  
281 based on the median, rather than the mean, of WMTI metrics substantially increases the  
282 reliability of an individual's data (Huber 2018). Data with outlying values (greater than 4  
283 standard deviations from the sample mean) in the white matter for any of the fitted metrics  
284 was excluded from further analysis. After excluding both outliers and individuals with  
285 excessive motion (>3mm, see above), the final data set included 109 sessions from 32  
286 intervention subjects and 66 sessions from 27 non-intervention control subjects.

287

### 288 ***Statistical Analysis***

289

290 Statistical analysis was carried out using software written in Matlab (*draft code link:*  
291 <https://github.com/yeatmanlab/BioBasis.git>). To assess change over the course of  
292 intervention, we first averaged the middle 80% of each tract to create a single estimate of  
293 each property for each subject and tract. We selected the middle portion to eliminate the  
294 influence of crossing fibers near cortical terminations, and to avoid potential partial volume

295 effects at the white matter / gray matter border. Mean tract values were then entered into a  
296 linear mixed effects model, with fixed effects of intervention time and a random effect of  
297 subject. For quantifying intervention effects, we prefer to use ‘hours of intervention’, since  
298 this variable directly reflects the intervention ‘dose’. For analyses including the control  
299 subjects, who did not participate in an intervention of any kind, we substitute ‘session’ for  
300 ‘hours’. Since sessions were held at regular intervals, the two variables were highly  
301 correlated (Pearson’s  $r = 0.98$ ,  $p < 0.001$ ).

302

## 303 **Results**

304

### 305 *Diffusion MRI*

306

307 Significant changes in mean diffusivity (MD) were apparent throughout the white matter  
308 in the intervention group (**Figure 1a-b**; tracts showing significant changes  $qFDR < 0.05$ ).  
309 In a group of age-matched control subjects who attended school as usual, we found no  
310 significant changes in white matter diffusivity over the same time frame, and growth  
311 estimates for the 16 pathways were distributed around zero (**Figure 1c**). A group  
312 (intervention vs. non-intervention) by time (session number) interaction was significant ( $p$   
313  $< 0.05$ , uncorrected) for the left arcuate and left inferior frontal-occipital fasciculus.

314

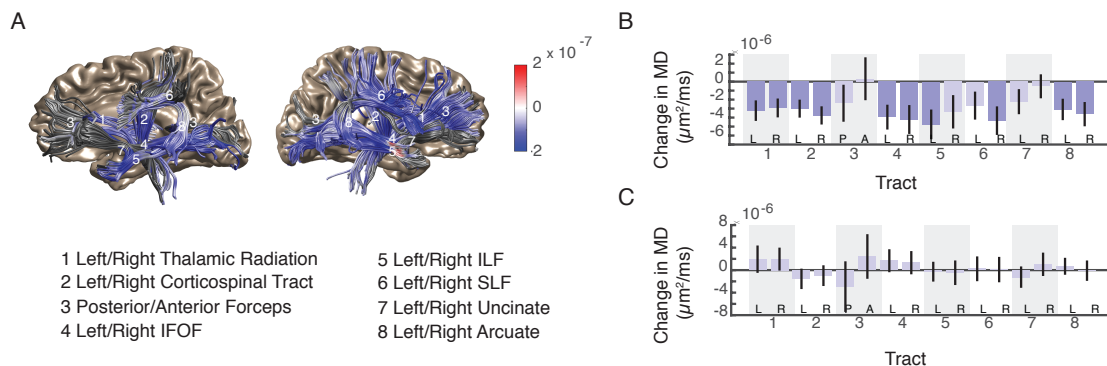

315

316

317 **Figure 1.** (A) White matter tracts are shown in two views (left hemisphere, right hemisphere) for  
318 an example subject. Color-coding is based on the coefficient from mean a linear mixed effects model  
319 predicting mean diffusivity (MD) values as a function of intervention hours at each location along  
320 each tract. Numeric labels correspond to the tract names listed at right. (B) Coefficients from a  
321 model ( $\pm 1$  SE) substituting ‘session’ for ‘hours of intervention’, for the intervention group. Darker  
322 shaded bars reflect significant change ( $q\text{FDR} < 0.05$ ). (C) Results for the control subjects, using the  
323 same statistical model as in (B). In the control group, growth estimates were distributed around zero  
324 with none of the tracts showing a significant change in MD over an 8-week period.

325

326 Although mean diffusivity is a highly sensitive measure (De Santis, Drakesmith et al. 2014,  
327 Huber 2018), it is not biologically specific. We next examined the effects of intervention  
328 on parameters estimated from the WMTI model: axonal water fraction (AWF) and extra-  
329 axonal mean diffusivity. As shown in **Figure 2**, intervention effects were limited to  
330 parameters associated with the extra-axonal space: Extra-axonal MD effects mirror the MD  
331 effects shown above. We saw no change in estimates of AWF over the intervention period.

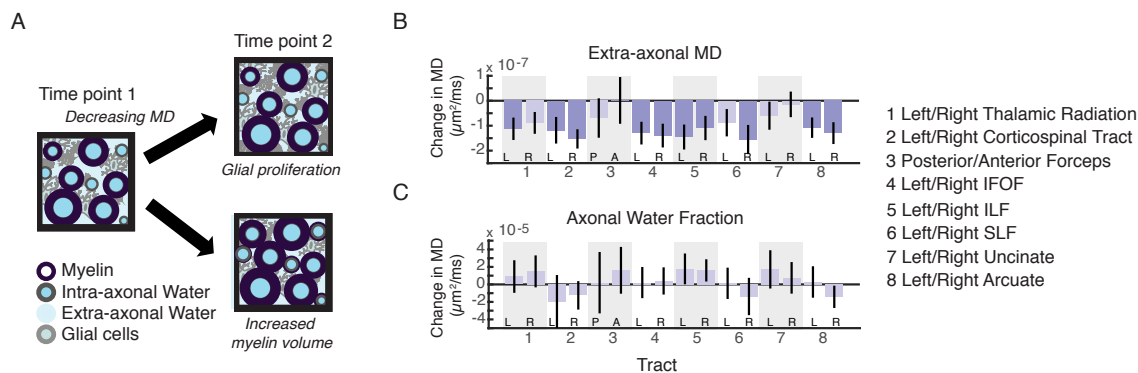

332

333 **Figure 2.** Microstructural modeling of white matter plasticity. (A) Illustration of two scenarios in  
 334 which mean diffusivity would decline in a voxel: proliferation of glial cells within the extra axonal  
 335 space (top) or increasing axon caliber and myelination (bottom). (B, C) Plots show coefficients from  
 336 a linear mixed effects model predicting extra-axonal mean diffusivity and axon water fraction  
 337 (AWF) from intervention time (in hours; random effect of subjects). Tracts showing significant  
 338 change ( $qFDR < 0.05$ ) are shaded.

339

340 We next examined how assumptions implemented in the WMTI model affect the results.  
 341 Typically, the WMTI model assumes higher diffusivity within the extra-axonal space  
 342 versus the intra-axonal space. This assumption is required for the model to converge on a  
 343 single solution (Fieremans, Jensen et al. 2011). However, recent work has called this  
 344 assumption into question (Jespersen, Olesen et al. 2018, Kunz, da Silva et al. 2018). Thus,  
 345 to examine how this choice might affect our interpretation of the data, we perform a  
 346 supplementary analysis in which we invert the assumed relationship between diffusivities  
 347 (intra- greater than extra-axonal). Inverting the assumed relationship between diffusivities  
 348 produced effects in intra-axonal diffusivity for the right IFOF and ILF, the left and right  
 349 SLF, and the right Arcuate ( $p < 0.05$ , uncorrected) and rendered the remaining effects non-  
 350 significant. Importantly, this change to the model does not affect our calculation of AWF



351 (Fieremans, Jensen et al. 2011), and so these results are the same under either set of  
352 assumptions: We find no detectable difference in AWF over the course of the intervention.

353

### 354 *Quantitative T1*

355

356 The effects observed in the diffusion MRI data set suggest that learning related changes in  
357 the white matter reflect increased hindrance of diffusion within the extra-axonal space,  
358 rather than an increase in the total volume of myelin. We next test this idea using using a  
359 separate qMRI data set. R1 measurements reflect both the total volume of tissue in a region,  
360 and the molecular composition, such as lipid and iron, of that tissue (Mezer, Yeatman et  
361 al. 2013, Stuber, Morawski et al. 2014, Filo, Shtangel et al. 2019). A decrease in the volume  
362 of myelinated tissue (or, an increase in water) within a voxel would be associated with  
363 lower measured R1 values, while an increase in myelinated tissue would be associated with  
364 elevated R1 measurements. Consistent with the interpretation suggested by the DKI and  
365 WMTI fits, we see no measureable change in R1 over the course of the intervention period  
366 in either group ( $qFDR < 0.05$ , **Figure 3a-b**), even when using a more lenient statistical  
367 threshold ( $p < 0.05$ , uncorrected). Meanwhile, tract-average R1 values measured at  
368 baseline in the anterior callosal tract, left arcuate, and left and right ILF correlate with  
369 individual differences in reading skill prior to the start of the intervention ( $p < 0.05$ ,  
370 uncorrected, **Figure 3c**), confirming that R1 is sensitive to behaviorally relevant properties  
371 of the white matter.

372

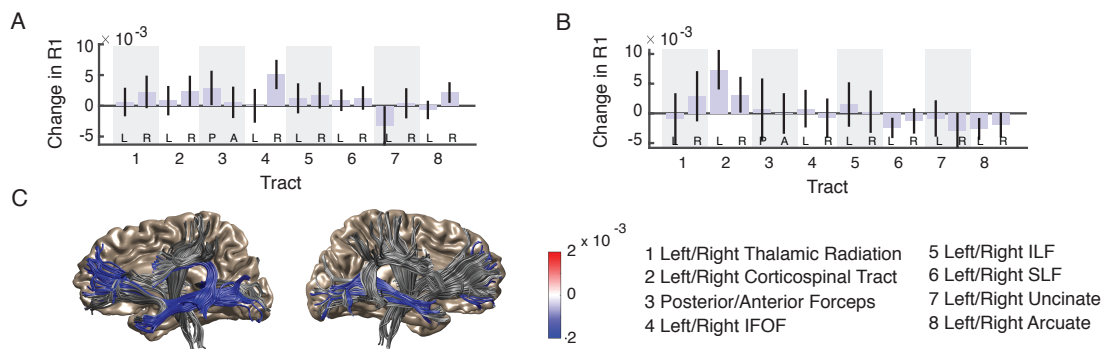

373

374

375 **Figure 3.** Quantitative R1 values do not show significant change over the intervention period in the  
376 intervention group (A), or the non-intervention control group (B). Bar plots show coefficients from  
377 a linear mixed effects model predicting R1 from intervention time (session; random effect of  
378 subject). (C) Baseline R1 values correlate pre-intervention reading performance. Color coding  
379 reflects the coefficient from a linear model predicting tract-average R1 values from (age-  
380 standardized) pre-intervention reading scores. Regions without a significant ( $p < 0.05$ ) relationship  
381 to behavior are colored gray.

382

### 383 Discussion

384

385 Here we use diffusion MRI and a model derived from diffusion kurtosis imaging  
386 (Fieremans, Jensen et al. 2011), alongside quantitative R1 (1/T1 relaxation time)  
387 measurements, to examine whether microstructural changes during a successful reading  
388 intervention are best interpreted as rapid, experience-dependent changes in the volume of  
389 axons and myelin, or as changes in diffusivity within the extra- and/or intra-axonal space.  
390 Our results support the latter interpretation. While we observed systematic changes in  
391 diffusivity during the intervention, we failed to detect a longitudinal change in restricted  
392 fraction of the diffusion signal (interpreted as axonal water fraction, AWF), which would

393 be expected to arise from a sufficiently large change in myelination (Jelescu, Zurek et al.  
394 2016), or a change in axon caliber. Although we interpret this null result cautiously, we  
395 have previously demonstrated that AWF can be estimated reliably in this age group, and  
396 that AWF is highly sensitive to maturational changes that occur over the timescale of years  
397 (Huber 2018). Consistent with the diffusion MRI results, we did not observe a change in  
398 quantitative R1 values over the intervention period. However, in the same individuals (both  
399 intervention and non-intervention control subjects), we found that R1 was correlated with  
400 pre-intervention reading skill. This argues that R1 measurements capture behaviorally  
401 relevant variation in white matter microstructure that are distinct from the biological  
402 mechanisms associated with short-term plasticity and learning during an intensive  
403 intervention.

404

405 We previously (Huber 2018) reported changes in mean diffusivity alongside growth in  
406 reading skills during an intensive reading intervention. If these effects indeed reflect  
407 properties of the extra-axonal space, what is the link to behavior? A systematic reduction  
408 in extra-axonal diffusivity, without corresponding changes in axonal water fraction or  
409 quantitative R1, could result from an increase in cell membranes hindering diffusion within  
410 the extra-axonal space, without a corresponding change in the total volume of that space.  
411 This might reflect proliferation of oligodendrocyte precursor cells (OPC), as seen in  
412 previous animal work (Gibson, Purger et al. 2014), although extra-axonal diffusivity  
413 estimates could also be influenced by changes in the size or distribution of astrocytes  
414 (Sampaio-Baptista and Johansen-Berg 2017, Seppeband, Cabeen et al. 2018).

415

416 The relationship between higher-level cognitive function, axonal, glial and vascular  
417 properties is likely to be complex, and the process of maintaining and optimizing signaling  
418 properties involves a number of distinct biological phenomena that operate over different  
419 time scales. However, it is increasingly clear that activation and proliferation of glial cells  
420 and their precursors is vital not only for maintenance of active connections within a circuit,  
421 but also for the optimization of signaling properties. For example, oligodendrocytes  
422 participate in myelin maintenance, repair, and use-related plasticity throughout the lifespan  
423 (reviewed in (Nave 2010)), and have been shown to regulate axon caliber directly,  
424 independent of myelination (Sanchez, Hassinger et al. 1996). This mechanism could  
425 theoretically support fast, activity-dependent changes in signaling efficiency and  
426 coordination. Neural activity, in turn, appears to promote oligodendrocyte precursor  
427 proliferation (Barres and Raff 1993), perhaps increasing the potential malleability of highly  
428 active circuits. Although the link between these biological phenomena and learning is not  
429 yet well understood, animal models have demonstrated a critical role of glia for brain  
430 function in health, and their dysfunction in disease states (Barres 2008). Studies employing  
431 longitudinal measurements, coupled with increasingly sophisticated imaging and modeling  
432 techniques, hold promise for revealing the interplay among distinct biological processes  
433 that support learning and cognition. Our findings highlight the importance of considering  
434 the often-ignored contribution of glial cells to diffusion measurements and associated  
435 cognitive functions in humans across the lifespan.

436

437 Linking the diffusion process to tissue biology requires making certain assumptions about  
438 the factors that contribute to measured diffusion signals (Novikov, Kiselev et al. 2018).

439 The WMTI model used here assumes well-aligned fibers as its inputs (Fieremans, Novikov  
440 et al. 2010). We have tried to assure that this assumption is met in our analysis by sampling  
441 voxels with fractional anisotropy values that fall within a range for which the model has  
442 been validated (Jensen, McKinnon et al. 2017, Chung, Fieremans et al. 2018). In order to  
443 fit the WMTI model with a single solution, one must further assume a higher rate of  
444 diffusivity within either the intra-axonal or extra-axonal space for a given region of interest.  
445 Previous work has validated the assumption of higher intrinsic diffusivity within the extra-  
446 axonal-space (Guglielmetti, Veraart et al. 2016, Jelescu, Zurek et al. 2016), although recent  
447 work has called this assumption into question (i.e., intra-axonal diffusivity may be greater  
448 than extra-axonal diffusivity; (Jespersen, Olesen et al. 2018, Kunz, da Silva et al. 2018)).  
449 Importantly, our calculation of AWF is robust, and does not depend on this assumption;  
450 thus, our main finding of stable AWF does not depend how the relative diffusivities are  
451 constrained. However, this choice does determine whether intervention-driven changes in  
452 diffusivity are attributed to the intra- versus extra-axonal space, in some cases. Although it  
453 is less clear what mechanism would alter the intrinsic diffusivity of the intra-axonal space  
454 over the timescales considered here, it is important to note that we cannot differentiate  
455 between these scenarios based solely on the WMTI model. Thus, our modeling results  
456 should not be interpreted as conclusive evidence for any specific biological mechanism.  
457  
458 Maturation differences in diffusion within the white matter reflect pruning of connections  
459 and changes in myelination that occur over the timescale of years (Chang, Owen et al.  
460 2015, Jelescu, Veraart et al. 2015), which may in turn influence reading outcomes  
461 (Yeatman, Dougherty et al. 2012). The current data support the notion that short-term

462 changes in diffusion properties reflect an initial stage of the learning process, but the  
463 connection between rapid changes and long-term remodeling of axons and myelin is  
464 currently unknown. Resolving the relationship between learning and plasticity at temporal  
465 scales ranging from hours (Sagi, Tavor et al. 2012, Hofstetter, Tavor et al. , Hofstetter,  
466 Friedmann et al.), to days (Huber 2018), to years (Yeatman, Dougherty et al. 2012, Wang,  
467 Mauer et al. 2017), will require research aimed at forging a tighter link between education  
468 and neuroscience.

469

470

471 **References**

472

473 Alexander, A. L., J. E. Lee, M. Lazar and A. S. Field (2007). "Diffusion tensor imaging of  
474 the brain." Neurotherapeutics **4**(3): 316-329.

475 Alexander, D. C., T. B. Dyrby, M. Nilsson and H. Zhang (2019). "Imaging brain  
476 microstructure with diffusion MRI: practicality and applications." NMR Biomed  
477 **32**(4): e3841.

478 Andersson, J. L., S. Skare and J. Ashburner (2003). "How to correct susceptibility  
479 distortions in spin-echo echo-planar images: application to diffusion tensor imaging."  
480 Neuroimage **20**(2): 870-888.

481 Andersson, J. L. and S. N. Sotiropoulos (2016). "An integrated approach to correction  
482 for off-resonance effects and subject movement in diffusion MR imaging."  
483 Neuroimage **125**: 1063-1078.

484 Barral, J. K., E. Gudmundson, N. Stikov, M. Etezadi-Amoli, P. Stoica and D. G. Nishimura  
485 (2010). "A robust methodology for in vivo T1 mapping." Magn Reson Med **64**(4):  
486 1057-1067.

487 Barres, B. A. (2008). "The mystery and magic of glia: a perspective on their roles in  
488 health and disease." Neuron **60**(3): 430-440.

489 Barres, B. A. and M. C. Raff (1993). "Proliferation of oligodendrocyte precursor cells  
490 depends on electrical activity in axons." Nature **361**(6409): 258-260.

491 Basser, P. J. and C. Pierpaoli (1996). "Microstructural and physiological features of  
492 tissues elucidated by quantitative-diffusion-tensor MRI." J Magn Reson B **111**(3):  
493 209-219.

494 Bell, N. (2007). Seeing stars. San Luis Obispo, CA, Gander.

495 Benitez, A., E. Fieremans, J. H. Jensen, M. F. Falangola, A. Tabesh, S. H. Ferris and J. A.

496 Helpert (2014). "White matter tract integrity metrics reflect the vulnerability of late-

497 myelinating tracts in Alzheimer's disease." Neuroimage Clin **4**: 64-71.

498 Blumenfeld-Katzir, T., O. Pasternak, M. Dagan and Y. Assaf (2011). "Diffusion MRI of

499 structural brain plasticity induced by a learning and memory task." PLoS One **6**(6):

500 e20678.

501 Cercignani, M. and S. Bouyagoub (2018). "Brain microstructure by multi-modal MRI:

502 Is the whole greater than the sum of its parts?" Neuroimage **182**: 117-127.

503 Chang, Y. S., J. P. Owen, N. J. Pojman, T. Thieu, P. Bukshpun, M. L. Wakahiro, J. I. Berman,

504 T. P. Roberts, S. S. Nagarajan, E. H. Sherr and P. Mukherjee (2015). "White Matter

505 Changes of Neurite Density and Fiber Orientation Dispersion during Human Brain

506 Maturation." PLoS One **10**(6): e0123656.

507 Chung, S., E. Fieremans, N. E. Kucukboyaci, X. Wang, C. J. Morton, D. S. Novikov, J. F.

508 Rath and Y. W. Lui (2018). "Working Memory And Brain Tissue Microstructure: White

509 Matter Tract Integrity Based On Multi-Shell Diffusion MRI." Sci Rep **8**(1): 3175.

510 De Santis, S., M. Drakesmith, S. Bells, Y. Assaf and D. K. Jones (2014). "Why diffusion

511 tensor MRI does well only some of the time: variance and covariance of white matter

512 tissue microstructure attributes in the living human brain." Neuroimage **89**: 35-44.

513 Engvig, A., A. M. Fjell, L. T. Westlye, T. Moberget, O. Sundseth, V. A. Larsen and K. B.

514 Walhovd (2012). "Memory training impacts short-term changes in aging white

515 matter: a longitudinal diffusion tensor imaging study." Hum Brain Mapp **33**(10):

516 2390-2406.



517 Falangola, M. F., D. N. Guilfoyle, A. Tabesh, E. S. Hui, X. Nie, J. H. Jensen, S. V. Gerum, C.  
518 Hu, J. LaFrancois, H. R. Collins and J. A. Helpert (2014). "Histological correlation of  
519 diffusional kurtosis and white matter modeling metrics in cuprizone-induced corpus  
520 callosum demyelination." NMR Biomed **27**(8): 948-957.

521 Fieremans, E., A. Benitez, J. H. Jensen, M. F. Falangola, A. Tabesh, R. L. Deardorff, M. V.  
522 Spampinato, J. S. Babb, D. S. Novikov, S. H. Ferris and J. A. Helpert (2013). "Novel white  
523 matter tract integrity metrics sensitive to Alzheimer disease progression." AJNR Am J  
524 Neuroradiol **34**(11): 2105-2112.

525 Fieremans, E., J. H. Jensen and J. A. Helpert (2011). "White matter characterization  
526 with diffusional kurtosis imaging." Neuroimage **58**(1): 177-188.

527 Fieremans, E., D. S. Novikov, J. H. Jensen and J. A. Helpert (2010). "Monte Carlo study  
528 of a two-compartment exchange model of diffusion." NMR Biomed **23**(7): 711-724.

529 Filo, S., O. Shtangel, N. Salamon, A. Kol, B. Weisinger, S. Shifman and A. A. Mezer  
530 (2019). "Disentangling molecular alterations from water-content changes in the  
531 aging human brain using quantitative MRI." Nat Commun **10**(1): 3403.

532 Garyfallidis, E., M. Brett, B. Amirbekian, A. Rokem, S. van der Walt, M. Descoteaux, I.  
533 Nimmo-Smith and C. Dipy (2014). "Dipy, a library for the analysis of diffusion MRI  
534 data." Front Neuroinform **8**: 8.

535 Genc, S., C. B. Malpas, S. K. Holland, R. Beare and T. J. Silk (2017). "Neurite density  
536 index is sensitive to age related differences in the developing brain." Neuroimage  
537 **148**: 373-380.

538 Gibson, E. M., D. Purger, C. W. Mount, A. K. Goldstein, G. L. Lin, L. S. Wood, I. Inema, S.  
539 E. Miller, G. Bieri, J. B. Zuchero, B. A. Barres, P. J. Woo, H. Vogel and M. Monje (2014).

540 "Neuronal activity promotes oligodendrogenesis and adaptive myelination in the  
541 mammalian brain." Science **344**(6183): 1252304.

542 Guglielmetti, C., J. Veraart, E. Roelant, Z. Mai, J. Daans, J. Van Audekerke, M. Naeyaert,  
543 G. Vanhoutte, Y. P. R. Delgado, J. Praet, E. Fieremans, P. Ponsaerts, J. Sijbers, A. Van der  
544 Linden and M. Verhoye (2016). "Diffusion kurtosis imaging probes cortical  
545 alterations and white matter pathology following cuprizone induced demyelination  
546 and spontaneous remyelination." Neuroimage **125**: 363-377.

547 Hofstetter, S., N. Friedmann and Y. Assaf (2017). "Rapid language-related plasticity:  
548 microstructural changes in the cortex after a short session of new word learning."  
549 Brain Struct Funct **222**(3): 1231-1241.

550 Hofstetter, S., I. Tavor, S. Tzur Moryosef and Y. Assaf (2013). "Short-term learning  
551 induces white matter plasticity in the fornix." JNeurosci **33**(31): 12844-12850.

552 Huber, E., Donnelly, P.M., Rokem, A., Yeatman, J.D. (2018). "Rapid and widespread  
553 white matter plasticity during an intensive reading intervention." Nature  
554 Communications.

555 Huber, E., Henriques, R.N., Owen, J.P., Rokem, A., Yeatman, J.D. (2018). "Applying  
556 biophysical models to understand the role of white matter in cognitive development."  
557 bioRxiv.

558 Jelescu, I. O. and M. D. Budde (2017). "Design and validation of diffusion MRI models  
559 of white matter." Front Phys **28**.

560 Jelescu, I. O., J. Veraart, V. Adisetiyo, S. S. Milla, D. S. Novikov and E. Fieremans (2015).  
561 "One diffusion acquisition and different white matter models: how does

562 microstructure change in human early development based on WMTI and NODDI?"  
563 Neuroimage **107**: 242-256.

564 Jelescu, I. O., M. Zurek, K. V. Winters, J. Veraart, A. Rajaratnam, N. S. Kim, J. S. Babb, T.  
565 M. Shepherd, D. S. Novikov, S. G. Kim and E. Fieremans (2016). "In vivo quantification  
566 of demyelination and recovery using compartment-specific diffusion MRI metrics  
567 validated by electron microscopy." Neuroimage **132**: 104-114.

568 Jensen, A., T. Stickley, W. Torrisen and K. Stigmar (2017). "Arts on prescription in  
569 Scandinavia: a review of current practice and future possibilities." Perspect Public  
570 Health **137**(5): 268-274.

571 Jensen, J. H., J. A. Helpert, A. Ramani, H. Lu and K. Kaczynski (2005). "Diffusional  
572 kurtosis imaging: the quantification of non-gaussian water diffusion by means of  
573 magnetic resonance imaging." Magn Reson Med **53**(6): 1432-1440.

574 Jensen, J. H., E. T. McKinnon, G. R. Glenn and J. A. Helpert (2017). "Evaluating kurtosis-  
575 based diffusion MRI tissue models for white matter with fiber ball imaging." NMR  
576 Biomed **30**(5).

577 Jespersen, S. N., J. L. Olesen, B. Hansen and N. Shemesh (2018). "Diffusion time  
578 dependence of microstructural parameters in fixed spinal cord." Neuroimage **182**:  
579 329-342.

580 Kelm, N. D., K. L. West, R. P. Carson, D. F. Gochberg, K. C. Ess and M. D. Does (2016).  
581 "Evaluation of diffusion kurtosis imaging in ex vivo hypomyelinated mouse brains."  
582 Neuroimage **124**(Pt A): 612-626.

583 Kunz, N., A. R. da Silva and I. O. Jelescu (2018). "Intra- and extra-axonal axial  
584 diffusivities in the white matter: Which one is faster?" Neuroimage **181**: 314-322.

585 Le Bihan, D. (1995). "Molecular diffusion, tissue microdynamics and microstructure."  
586 NMR Biomed **8**(7-8): 375-386.

587 Lerch, J. P., A. P. Yiu, A. Martinez-Canabal, T. Pekar, V. D. Bohbot, P. W. Frankland, R.  
588 M. Henkelman, S. A. Josselyn and J. G. Sled (2011). "Maze training in mice induces MRI-  
589 detectable brain shape changes specific to the type of learning." Neuroimage **54**(3):  
590 2086-2095.

591 Mamiya, P. C., T. L. Richards, B. P. Coe, E. E. Eichler and P. K. Kuhl (2016). "Brain white  
592 matter structure and COMT gene are linked to second-language learning in adults."  
593 Proc Natl Acad Sci U S A **113**(26): 7249-7254.

594 Mezer, A., A. Rokem, S. Berman, T. Hastie and B. A. Wandell (2016). "Evaluating  
595 quantitative proton-density-mapping methods." Hum Brain Mapp **37**(10): 3623-  
596 3635.

597 Mezer, A., J. D. Yeatman, N. Stikov, K. N. Kay, N. J. Cho, R. F. Dougherty, M. L. Perry, J.  
598 Parvizi, H. Hua le, K. Butts-Pauly and B. A. Wandell (2013). "Quantifying the local  
599 tissue volume and composition in individual brains with magnetic resonance  
600 imaging." Nat Med **19**(12): 1667-1672.

601 Nave, K. A. (2010). "Myelination and support of axonal integrity by glia." Nature  
602 **468**(7321): 244-252.

603 Novikov, D. S., V. G. Kiselev and S. N. Jespersen (2018). "On modeling." Magn Reson  
604 Med **79**(6): 3172-3193.

605 Sagi, Y., I. Tavor, S. Hofstetter, S. Tzur-Moryosef, T. Blumenfeld-Katzir and Y. Assaf  
606 (2012). "Learning in the fast lane: new insights into neuroplasticity." Neuron **73**(6):  
607 1195-1203.

608 Sampaio-Baptista, C. and H. Johansen-Berg (2017). "White Matter Plasticity in the  
609 Adult Brain." Neuron **96**(6): 1239-1251.

610 Sampaio-Baptista, C., A. A. Khrapitchev, S. Foxley, T. Schlagheck, J. Scholz, S. Jbabdi, G.  
611 C. DeLuca, K. L. Miller, A. Taylor, N. Thomas, J. Kleim, N. R. Sibson, D. Bannerman and  
612 H. Johansen-Berg (2013). "Motor skill learning induces changes in white matter  
613 microstructure and myelination." JNeurosci **33**(50): 19499-19503.

614 Sanchez, I., L. Hassinger, P. A. Paskevich, H. D. Shine and R. A. Nixon (1996).  
615 "Oligodendroglia regulate the regional expansion of axon caliber and local  
616 accumulation of neurofilaments during development independently of myelin  
617 formation." JNeurosci **16**(16): 5095-5105.

618 Sepehrband, F., R. P. Cabeen, J. Choupan, G. Barisano, M. Law and A. W. Toga (2018).  
619 "A systematic bias in DTI findings." bioRxiv.

620 Stuber, C., M. Morawski, A. Schafer, C. Labadie, M. Wahnert, C. Leuze, M. Streicher, N.  
621 Barapatre, K. Reimann, S. Geyer, D. Spemann and R. Turner (2014). "Myelin and iron  
622 concentration in the human brain: a quantitative study of MRI contrast." Neuroimage  
623 **93 Pt 1**: 95-106.

624 Takemura, H., S. Ogawa, A. A. Mezer, H. Horiguchi, A. Miyazaki, K. Matsumoto, K.  
625 Shikishima, T. Nakano and Y. Masuda (2019). "Diffusivity and quantitative T1 profile  
626 of human visual white matter tracts after retinal ganglion cell damage." Neuroimage  
627 Clin **23**: 101826.

628 Taubert, M., B. Draganski, A. Anwander, K. Muller, A. Horstmann, A. Villringer and P.  
629 Ragert (2010). "Dynamic properties of human brain structure: learning-related

630 changes in cortical areas and associated fiber connections." J Neurosci **30**(35): 11670-  
631 11677.

632 Tournier, J. D., F. Calamante, D. G. Gadian and A. Connelly (2004). "Direct estimation  
633 of the fiber orientation density function from diffusion-weighted MRI data using  
634 spherical deconvolution." Neuroimage **23**(3): 1176-1185.

635 Travis, K. E., M. R. H. Castro, S. Berman, C. K. Dodson, A. A. Mezer, M. Ben-Shachar and  
636 H. M. Feldman (2019). "More than myelin: Probing white matter differences in  
637 prematurity with quantitative T1 and diffusion MRI." Neuroimage Clin **22**: 101756.

638 Walhovd, K. B., H. Johansen-Berg and R. T. Karadottir (2014). "Unraveling the secrets  
639 of white matter--bridging the gap between cellular, animal and human imaging  
640 studies." Neuroscience **276**: 2-13.

641 Wang, Y., M. V. Mauer, T. Raney, B. Peysakhovich, B. L. C. Becker, D. D. Sliva and N.  
642 Gaab (2017). "Development of Tract-Specific White Matter Pathways During Early  
643 Reading Development in At-Risk Children and Typical Controls." Cereb Cortex **27**(4):  
644 2469-2485.

645 Yeatman, J. D., R. F. Dougherty, M. Ben-Shachar and B. A. Wandell (2012).  
646 "Development of white matter and reading skills." Proc Natl Acad Sci U S A **109**(44):  
647 E3045-3053.

648 Yeatman, J. D., R. F. Dougherty, N. J. Myall, B. A. Wandell and H. M. Feldman (2012).  
649 "Tract profiles of white matter properties: automating fiber-tract quantification."  
650 PLoS One **7**(11): e49790.

651 Yendiki, A., K. Koldewyn, S. Kakunoori, N. Kanwisher and B. Fischl (2014). "Spurious  
652 group differences due to head motion in a diffusion MRI study." Neuroimage **88**: 79-  
653 90.  
654
